# Supplementary material for: GNSS2TWS_Slepian: A software to recover daily GNSS-inverted terrestrial water storage changes based on Slepian basis functions
Source: Research Square preprint supplement (doi:10.21203/rs.3.rs-4678987/v1), 2024-08-09
Supplement: Supplementary file 1 [file 127ec3aa805815b91d5c10c8.docx]

**GPS Solutions**

Supporting information for

**GNSS2TWS_Slepian: A software to recover daily GNSS-inverted terrestrial water storage changes based on Slepian basis functions**

Zhongshan Jiang1,2, *, Miao Tang3, Haiping Wen3, and Linguo Yuan3

1 School of Geospatial Engineering and Science, Sun Yat-sen University, Zhuhai 519082, China

2 Key Laboratory of Comprehensive Observation of Polar Environment (Sun Yat-sen University), Ministry of Education, China

3 Faculty of Geosciences and Engineering, Southwest Jiaotong University, Chengdu 611756, China

* Corresponding authors: Zhongshan Jiang (jiangzhsh@mail.sysu.edu.cn)

Contents of this file

- Texts S1-S4
- Figures S1-S4
- **Text S1 Generating Slepian basis functions**

Spherical harmonic functions are a convenient tool to represent some globally distributed geophysical fields on the spherical Earth. In a practical application, a geophysical field can be expressed with spherical harmonics expansion with a limited bandwidth () as follows:

where denotes the time-varying -degree signal at a specific location defined by colatitude and longitude , and indicate the harmonic coefficient and spherical harmonic functions at the degree and order , respectively, the Earth’s radius is denoted with .

To a non-global modeling, extracting regional signals from the global spectrum becomes challenging. Alternatively, the Slepian approach (Slepian 1983) offers a solution by constructing a new set of basis functions that are both globally and locally orthogonal. This enables an accurate representation of regional signals through a linear combination of these Slepian basis functions as follows:

where and represent the th Slepian basis function and the corresponding coefficient, respectively. In mathematics, there exists a linear mapping relationship between the global basis function and the Slepian basis function , which can be expressed as:

where is orthogonal localization coefficients used for the linear transformation. Typically, truncating the spherical harmonic functions at degree allows us to obtain groups of orthogonal Slepian basis functions. According to the spatial-spectral concentration problem, it is equivalent to a maximization problem of the ratio between the power of the function within a given area and that within the entire globe , which can be described as follows:

where () shows the energy concentration ratio of the th Slepian basis function. One approach to maximizing the concentration criterion in the spectral domain is solving the algebraic eigenvalue problem (Han and Razeghi 2017; Simons et al. 2006). In this study, we utilize the open-source tool, called SLEPIAN Alpha (Harig et al. 2015), to calculate the localization coefficients and Slepian basis functions, which are uniquely related to a specified region.

- **Text S2 Inversion modeling for large-scale TWS changes**

The inversion method of large-scale TWS changes using GNSS vertical observations based on Slepian basis functions is proposed by Han and Razeghi (2017). Taking vertical crustal displacement (VCD) as an example, the discrete VCD data on the Earth's surface can be expressed with both global and localized spherical harmonic functions as follows:

where is the time-varying vertical positions truncated with the degree of , and denote the Slepian basis functions and corresponding VCD-related Slepian coefficient, and represent the th-order, th-degree global spherical harmonic functions and corresponding VCD-related spherical coefficient. The above two displacement-related coefficients are linearly correlated and can be transformed into each other as follows:

In general, we need to truncate the Slepian basis functions with a small number of degrees, so that only a small number of Slepian coefficients are estimated using the least squares regularization. After obtaining the VCD-related Slepian coefficients, we can convert them into EWH-related Slepian coefficients based on the mass loading theory (Farrell 1972), which can be written as follows (Han and Razeghi 2017):

where is the time-varying EWH-related Slepian coefficients at theth degree, and are the localization coefficients related to VCD and EWH, respectively. denotes th-degree load Love numbers, and represent the density of fresh water and Earth, is the truncated degree of Slepian basis functions, which is generally determined according to the magnitude of eigenvalue .

After obtaining the EWH-related Slepian coefficients, EWH estimates at any location can be calculated using the following formula:

where is the time-varying EWH estimates at the colatitude of and longitude of . To make the synthesis more robust, an eigenvalue () weighted strategy is generally applied according to Han and Razeghi (2017), which aims to damp the contributions from less accurately solved coefficients at higher .

- **Text S3 Extracting hydrological load displacement**

The GNSS data are processed at the Nevada Geodetic Laboratory (NGL, http://geodesy.unr.edu/), University of Nevada, Reno, United States. The GNSS position time series are generated using the GipsyX-1.0 software from the Jet Propulsion Laboratory (JPL). For more details on GNSS data processing strategy, readers can refer to the document (http://geodesy.unr.edu/gps/ngl.acn.txt) (Blewitt et al. 2018). Following previous studies (Argus et al. 2017; Argus et al. 2021) who handpicked the GNSS stations with elasticity-dominated deformation via the omission of GNSS sites suffering from volcanism and plastic-poroelastic deformation due to groundwater and petroleum extraction, we further filtrate the GNSS stations with more than 8-year observations and decluster our GNSS stations within 50 km to reduce the computational burden. In our study, we consider the enhanced version of GNSS position time series products recently provided by NGL (http://geodesy.unr.edu/gps_timeseries/tenv3_loadpredictions/), which adds extra columns to deposit the site-related predictions of non-tidal atmospheric loading, non-tidal ocean loading displacements (Dill and Dobslaw 2013) obtained by interpolation from gridded products produced by German Research Centre for Geosciences (http://esmdata.gfz-potsdam.de:8080/repository).

In total, 332 GNSS stations are chosen to infer large-scale TWS changes and to characterize hydrological extremes in the WUSA region. We extract the water-induced vertical surface movements, which feature upward motions as water runs off and subsidence when water loads. The well-modeled predictions including non-tidal oceanic loading and atmospheric loading effects are subtracted from the previously downloaded GNSS time series. We then fit each GNSS time series with a constant, a linear (indicating long-term tectonic motion), two sinusoids (representing annual and semiannual signals), and some Heaviside (representing instrumental and coseismic jumps) and logarithmic (modeling postseismic deformation) functions when needed (Jiang et al. 2022b). After the removal of constant, linear, offset, and postseismic terms, the residual time series containing sinusoid signals are dominated by seasonal and inter-annual hydrology-induced deformations (Figures 3b–3f).

- **Text S4 Hydrological analysis tool**

The GNSS2TWS_Slepian software also provides some practical tools for conventional hydrological analysis. The main functions include the calculation of basin-averaged EWH time series, climatological averages, EWH anomaly time series, water storage deficit, and surplus time series, and standardized EWH anomaly time series. The basin-averaged EWH time series are calculated using a latitude-weighted scheme and it contributes to analyzing time-varying characteristics of watershed-scale TWS changes. Methods in climatology are used for the characterization of hydrological extremes, i.e., the GNSS inversion results are used for drought assessment using the GNSS-based drought severity index (GNSS-DSI) (Jiang et al. 2022a). The GNSS-DSI is a newly-developed drought index, which can be defined as normalized EWH anomalies (Jiang et al. 2022a):

where indicates monthly EWH time series in -month of -year, and denotes the average (or climatological normal) and standard deviation of the -month EWH values in all years, is referred to as water anomalies deviating from climatological normal, with negative values for water deficits and positive values for water surpluses.


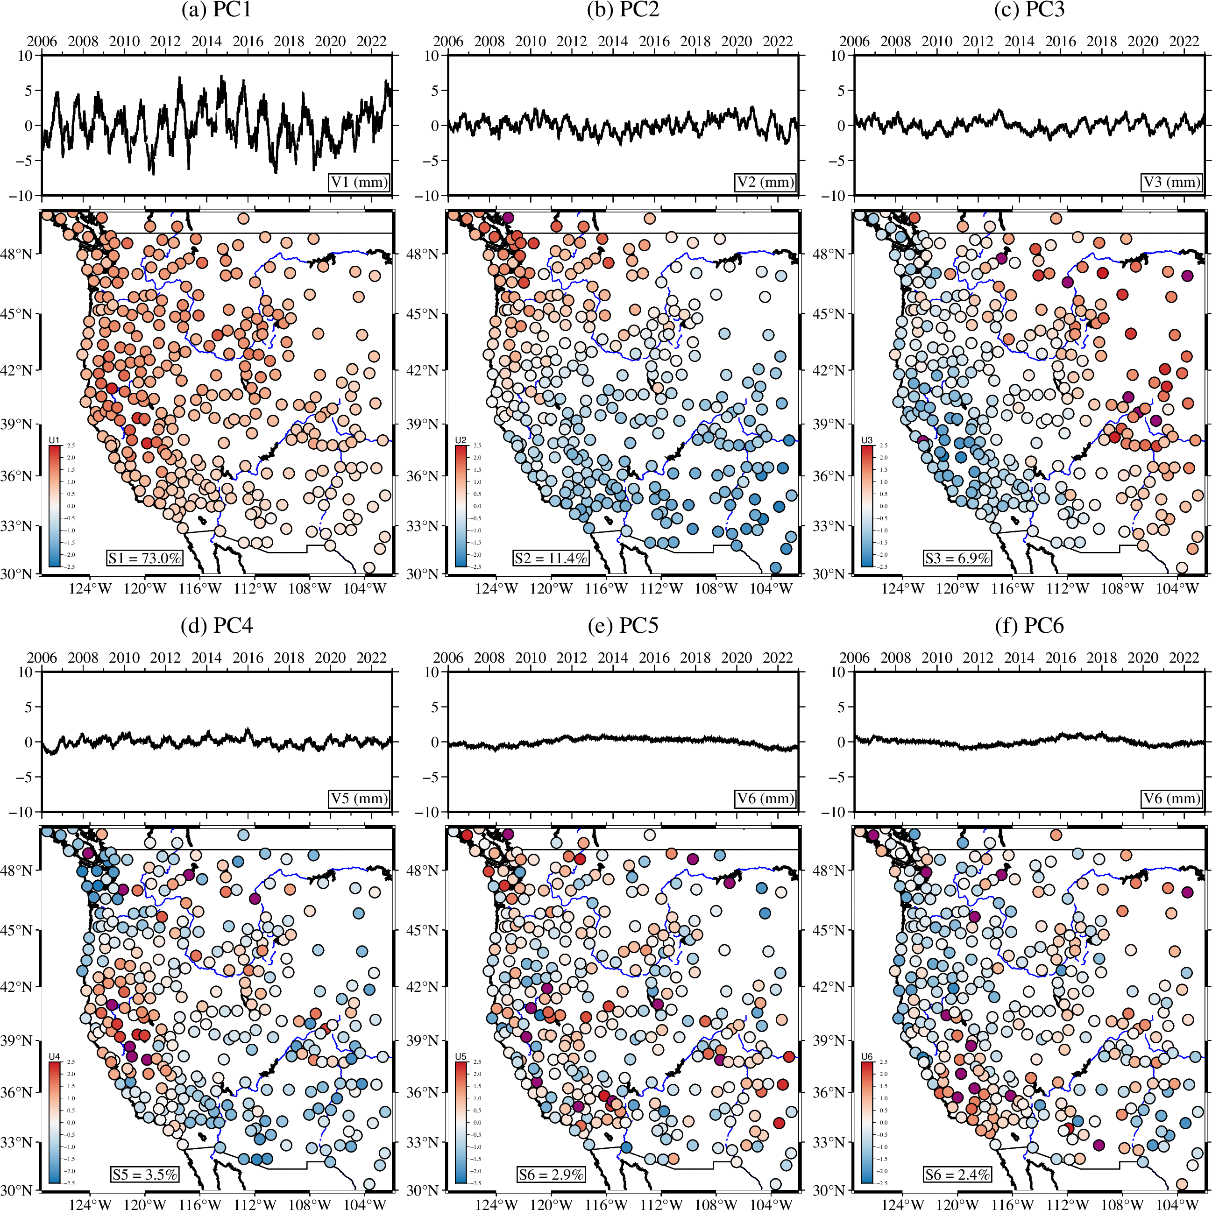


Figure S1. PCA decomposition results. In total, the first six PCs (a–f) cumulatively explaining 82.5% of the data variance are selected in our study. In each subgraph, black lines in the top panel show the temporal functions (), color-coded circles in the bottom panel represent the spatial functions (), is the variance contribution to the filtered data.


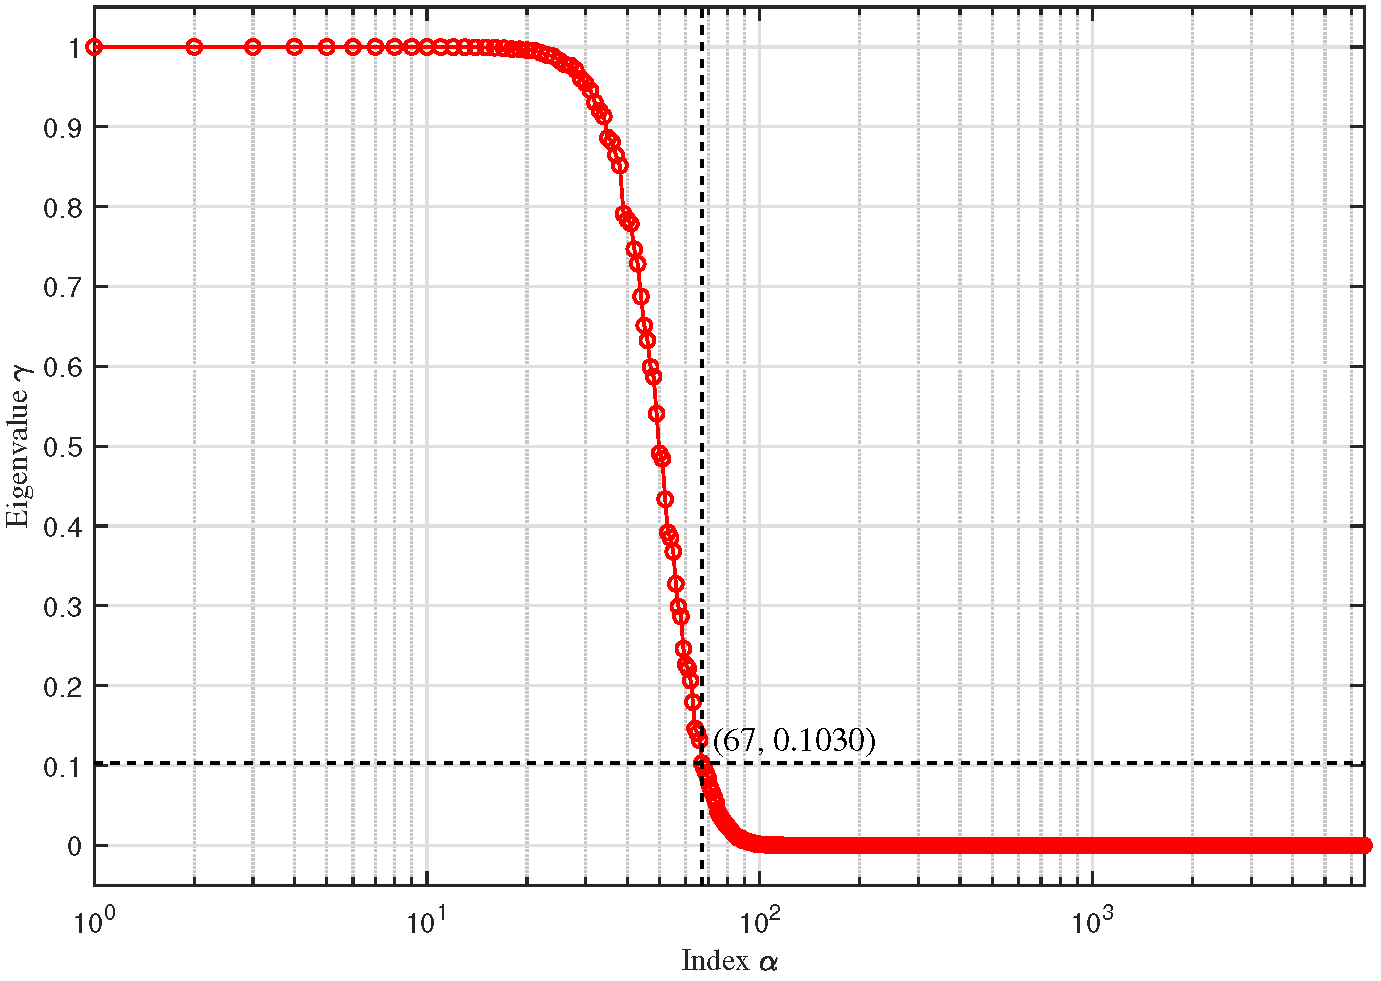


Figure S2. Concentration ratio of 6561 Slepian basis functions corresponding to spherical harmonic functions with an 80-degree bandwidth. The first 67 Slepian basis functions are used for the recovery of daily water height changes.


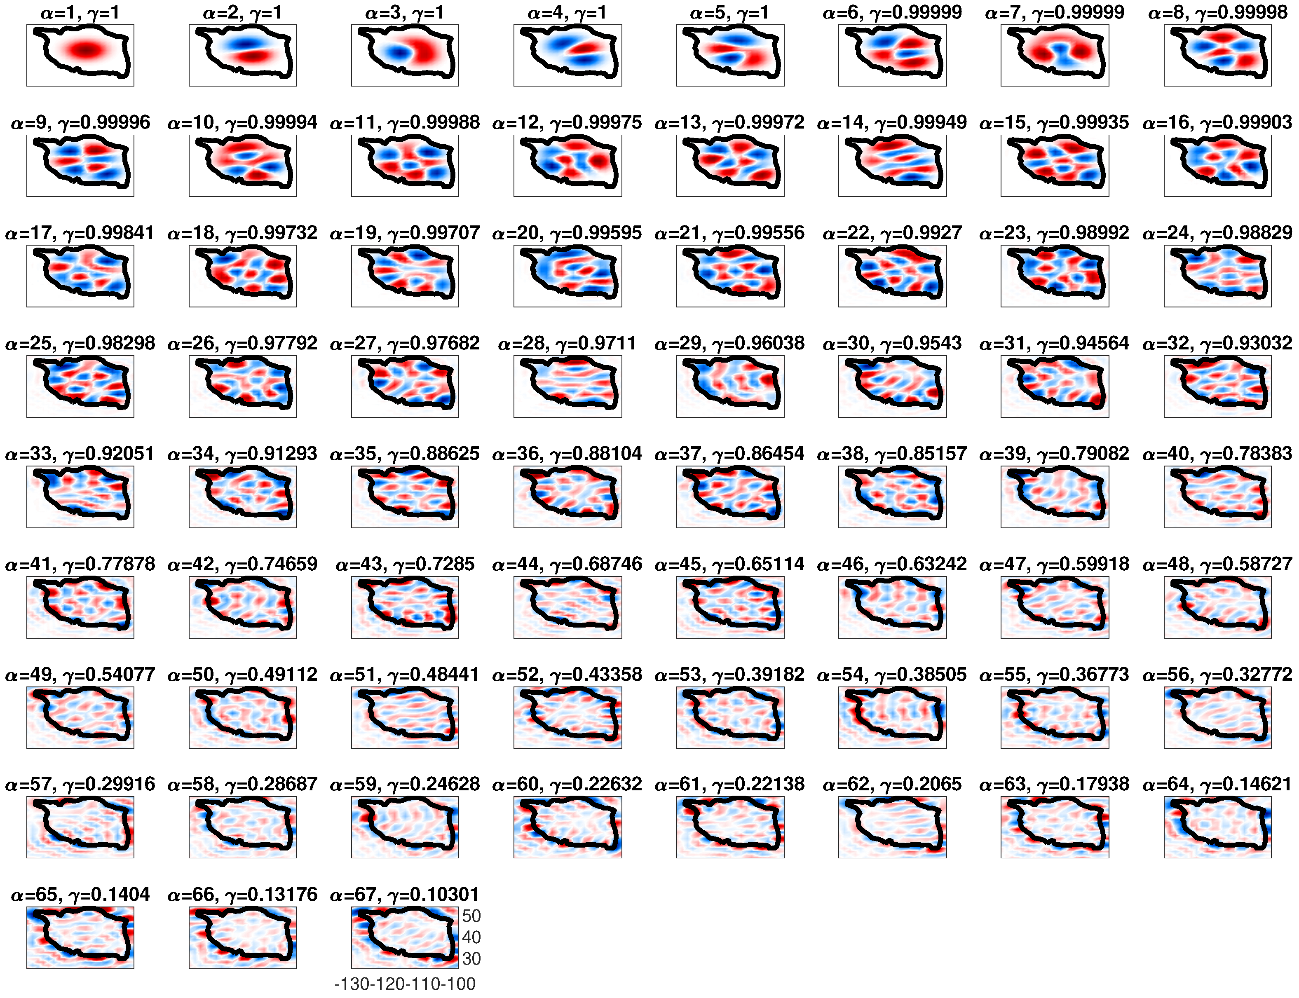


Figure S3. Maps of the selected 67 Slepian basis functions with black boundary lines. Each basis function is normalized with blue (negative), white (zero), and red (positive) colors.


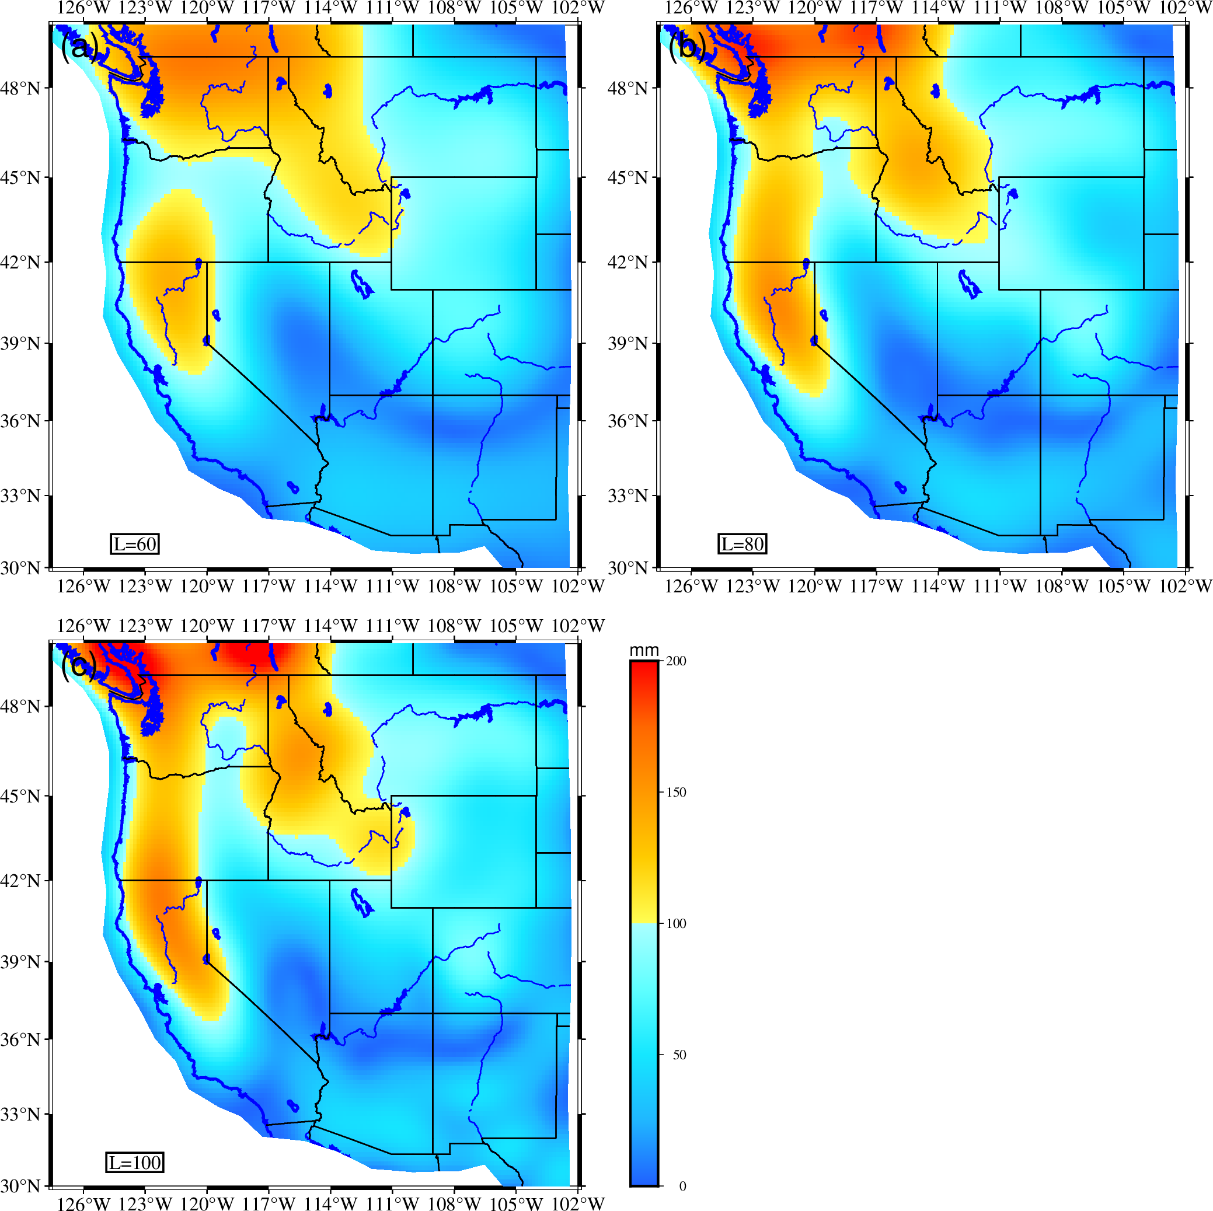


Figure S4. Annual amplitudes of GNSS-EWH estimates with the truncation degrees of 60 (a), 80 (b), and 100 (c).

**References**

Argus, D.F., Landerer, F.W., Wiese, D.N., Martens, H.R., Fu, Y., Famiglietti, J.S., Thomas, B.F., Farr, T.G., Moore, A.W., & Watkins, M.M. (2017). Sustained Water Loss in California's Mountain Ranges During Severe Drought From 2012 to 2015 Inferred From GPS. *Journal of Geophysical Research: Solid Earth, 122*. doi: 10.1002/2017jb014424

Argus, D.F., Peltier, W.R., Blewitt, G., & Kreemer, C. (2021). The Viscosity of the Top Third of the Lower Mantle Estimated Using GPS, GRACE, and Relative Sea Level Measurements of Glacial Isostatic Adjustment. *Journal of Geophysical Research: Solid Earth, 126*. doi: 10.1029/2020jb021537

Blewitt, G., Hammond, W., & Kreemer, C. (2018). Harnessing the GPS Data Explosion for Interdisciplinary Science. *Eos, 99*. doi: 10.1029/2018eo104623

Dill, R., & Dobslaw, H. (2013). Numerical simulations of global‐scale high‐resolution hydrological crustal deformations. *Journal of Geophysical Research: Solid Earth, 118*, 5008-5017. doi: 10.1002/jgrb.50353

Farrell, W.E. (1972). Deformation of the Earth by surface loads. *Reviews of Geophysics, 10*. doi: 10.1029/RG010i003p00761

Han, S.C., & Razeghi, S.M. (2017). GPS Recovery of Daily Hydrologic and Atmospheric Mass Variation: A Methodology and Results From the Australian Continent. *Journal of Geophysical Research: Solid Earth, 122*, 9328-9343. doi: 10.1002/2017jb014603

Harig, C., Lewis, K.W., Plattner, A., & Simons, F.J. (2015). A Suite of Software Analyzes Data on the Sphere. *Eos, 96*. doi: 10.1029/2015eo025851

Jiang, Z., Hsu, Y.-J., Yuan, L., Cheng, S., Feng, W., Tang, M., & Yang, X. (2022a). Insights into hydrological drought characteristics using GNSS-inferred large-scale terrestrial water storage deficits. *Earth and Planetary Science Letters, 578*. doi: 10.1016/j.epsl.2021.117294

Jiang, Z., Hsu, Y.J., Yuan, L., Tang, M., Yang, X., & Yang, X. (2022b). Hydrological drought characterization based on GNSS imaging of vertical crustal deformation across the contiguous United States. *Sci Total Environ, 823*, 153663. doi: 10.1016/j.scitotenv.2022.153663

Simons, F.J., Dahlen, F.A., & Wieczorek, M.A. (2006). Spatiospectral Concentration on a Sphere. *SIAM Review, 48*, 504-536. doi: 10.1137/s0036144504445765

Slepian, D. (1983). Some comments on Fourier analysis, uncertainty and modeling. *SIAM Review, 25*, 379-393. doi: 10.1137/1025078
